# Supplementary material for: Investigating the hydration of C3A in the presence of the potentially toxic element chromium–a route to remediation?
Source: Royal Society of Chemistry journal article supplement (doi:10.1039/d2ra04497h), 2022-01-01

Supplementary Information

Figure A: Structural diagram of part of the structure of C3A (tricalcium aluminate,  $\text{Ca}_3\text{Al}_2\text{O}_6$ ) illustrating the coordination of calcium (blue) to oxygen (green), and aluminium (red) to oxygen (Figure produced using the crystal structure drawing package VESTA (Copyright (C) 2006-2018, Koichi Momma and Fujio Izumi))

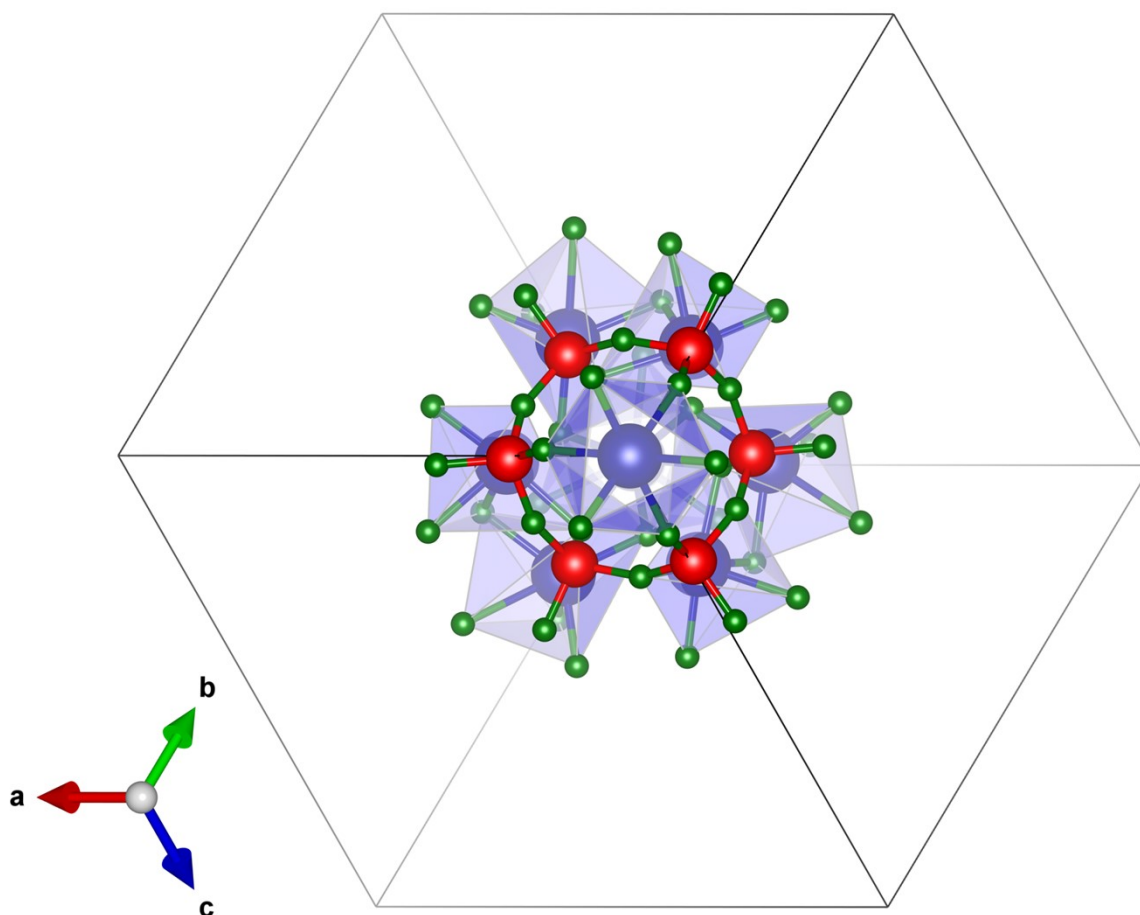

Supplement: d2ra04497h1.pdf [file d2ra04497h1.pdf]
